# Supplementary material for: The Effect of Mode of Delivery On Health-Related Quality-of-Life In Mothers: A Systematic Review And Meta-Analysis
Source: Research Square preprint supplement (doi:10.21203/rs.3.rs-839758/v1), 2021-09-01
Supplement: Supplementary file 1 [file 43344ae71b1d46a23d570020.docx]

# Appendices

## Appendix 1: MEDLINE Search Strategy

**Database(s): Ovid MEDLINE(R) ALL**1946 to October 15, 2020

| [**#**](https://ovidsp.dc1.ovid.com/ovid-b/ovidweb.cgi?&S=MKCHFPBOKBACOKCMKPPJPFKIDDPAAA00&Sort+Sets=descending) | **Searches** | **Results** |
| --- | --- | --- |
| 1 | exp Delivery, Obstetric/ | 161023 |
| 2 | parturition.mp. or exp Parturition/ | 45386 |
| 3 | exp Cesarean Section/ and vaginal delivery.mp. | 19812 |
| 4 | childbirth.mp. | 39868 |
| 5 | exp Postpartum Period/ | 74282 |
| 6 | 1 or 2 or 3 or 4 or 5 | 287015 |
| 7 | exp "Quality of Life"/ | 557613 |
| 8 | HRQoL.mp. | 33014 |
| 9 | health-related quality of life.mp. | 78917 |
| 10 | eq-5d.mp. | 19139 |
| 11 | euroqol.mp. | 11088 |
| 12 | sf-36.mp. | 38860 |
| 13 | sf-6d.mp. | 1668 |
| 14 | sf-12.mp. | 8829 |
| 15 | 7 or 8 or 9 or 10 or 11 or 12 or 13 or 14 | 587670 |
| 16 | 6 and 15 | 2849 |
| 17 | limit 16 to (english language and humans) | 2600 |
| 18 | limit 17 to yr=2019-20201015 | 513 |
| 19 | limit 18 to yr=2019-20201015 | 173 |

##

## Appendix 2: Data Extraction Form Template

Data Extraction Form

General Study Information

| Initials of person extracting data | KE |
| --- | --- |
| Study ID *(endnote number)* |  |
| Study citation/reference |  |
| Reference of other reports of this study (e.g protocol, offshoot publication) |  |

Study Characteristics

**Methods**

|  | **Descriptions as stated in report/paper** | **Location in text or source** *(pg & ¶/fig/table/other)* |
| --- | --- | --- |
| Aim of study |  |  |
| Design |  |  |
| Duration |  |  |
| Inclusion criteria |  |  |
| Exclusion criteria |  |  |
| Study funding sources |  |  |

**Participants**

|  | Description  *Include comparative information for each intervention or comparison group if available* | Location in text or source *(pg & ¶/fig/table/other)* |
| --- | --- | --- |
| Country |  |  |
| Setting *(hospital/home)* |  |  |
| Sample size |  |  |
| Method of recruitment of participants *(e.g. phone, mail, clinic patients)* |  |  |
| Demographic characteristics | | **Maternal:** | **Yes** | **No** | **Unclear** | **If yes, detail** | | --- | --- | --- | --- | --- | | Age  *Mean (SD)* |  |  |  |  | | BMI  *Mean (SD)* |  |  |  |  | | Ethnicity % |  |  |  |  | | Education status |  |  |  |  | | Marital civil status |  |  |  |  | | Socioeconomic status |  |  |  |  | | Parity |  |  |  |  | | Mode of delivery |  |  |  |  | | Years since delivery |  |  |  |  | | Gestational age |  |  |  |  | | Others |  | | | | |  |
| Baseline imbalances |  |  |
| Withdrawals and exclusions | |  | **Yes** | **No** | **Unclear** | **If yes, detail** | | --- | --- | --- | --- | --- | | Flow chart |  |  |  |  |  |  | Description | | --- | --- | | No. approached/invited |  | | No. eligible |  | | No. started/included in study |  | | People excluded from the study, number and reason(s) |  | | No. at end |  | | % followed-up |  | |  |
| Notes: | | | |

**Outcomes**

|  | Description as stated in report/paper | Location in text or source *(pg & ¶/fig/table/other)* |
| --- | --- | --- |
| Primary Outcome |  |  |
| Secondary Outcome |  |  |
| Power |  |  |
| Type of HRQoL tool |  |  |

| HRQoL score | Vaginal delivery:   |  | **Yes** | **No** | **Unclear** | **Detail** | | --- | --- | --- | --- | --- | | Overall HRQOL average |  |  |  |  | | Average by physical component score (PCS) and mental component score (MSC) |  |  |  |  | | Average HRQoL by dimension *e.g. Overall QoL, Physical function, Physical role, Bodily pain, General health, Vitality, Social role functioning, Emotional role, Mental health.* |  |  |  |  |   Caesarean section:   |  | **Yes** | **No** | **Unclear** | **Detail** | | --- | --- | --- | --- | --- | | Overall HRQOL average |  |  |  |  | | Average by physical component score (PCS) and mental component score (MSC) |  |  |  |  | | Average HRQoL by dimension *e.g. Overall QoL, Physical function, Physical role, Bodily pain, General health, Vitality, Social role functioning, Emotional role, Mental health.* |  |  |  |  | |  |
| --- | --- | --- | --- | --- | --- | --- | --- | --- | --- | --- | --- | --- | --- | --- | --- | --- | --- | --- | --- | --- | --- | --- | --- | --- | --- | --- | --- | --- | --- | --- | --- | --- | --- | --- | --- | --- | --- | --- | --- | --- | --- | --- |
| Time points measurement *(e.g. No. mean ±SD at baseline, 3 months, 6 months etc)* |  |  |
| Notes *(any data transformation, e.g. SE to SD etc.)*: | | |

**Analysis**

|  | Description as stated in report/paper | Location in text or source *(pg & ¶/fig/table/other)* |
| --- | --- | --- |
| Method of analysis |  |  |
| Imputation of missing data *(e.g. assumptions made for ITT analysis)* | | Yes | No | Unclear | If yes, detail | | --- | --- | --- | --- | |  |  |  |  | |  |
| Adjust for confounders | |  | Yes | No | Unclear | If yes, detail | | --- | --- | --- | --- | --- | | Parity |  |  |  |  | | Gestational age at delivery |  |  |  |  | | Induction of labor |  |  |  |  | | Analgesics |  |  |  |  | | Hospital setting |  |  |  |  | | Preterm birth |  |  |  |  | | Birth weight |  |  |  |  | |  |
| Notes: | | |

**Risk of Bias**

| **Domain** | **Risk of bias** | | | **Support for judgement**  *(include direct quotes where available with explanatory comments)* | **Location in text or source** *(pg & ¶/fig/table/other)* |
| --- | --- | --- | --- | --- | --- |
| Low | High | Unclear |
| **Confounding variables:**  *Selection bias caused by the inadequate confirmation and consideration of*  *confounding variable* |  |  |  |  |  |
| **Selection of participants:**  *Selection bias caused by the inadequate selection of participants* |  |  |  |  |  |
| **Measurement of exposure:**  *Performance bias caused by the inadequate measurement of exposure* |  |  |  |  |  |
| **Bias due to deviations from intended exposure**  *Performance bias –* *differences in care between groups* |  |  |  |  |  |
| **Incomplete outcome data**  *Attrition bias caused by the inadequate handling of incomplete outcome data* |  |  |  |  |  |
| **Bias in measurement of outcomes**  *Measurement bias* |  |  |  |  |  |
| **Selective outcome reporting?**  *Reporting bias* |  |  |  |  |  |
| Other bias |  |  |  |  |  |
| Notes: | | | | | |
